# Supplementary material
Source: HighWire-hosted journal article supplement (https://qualitysafety.bmj.com/content/27/12/989)
Supplement: inline-supplementary-material-4 [file inline-supplementary-material-4.pdf]

Appendix 4

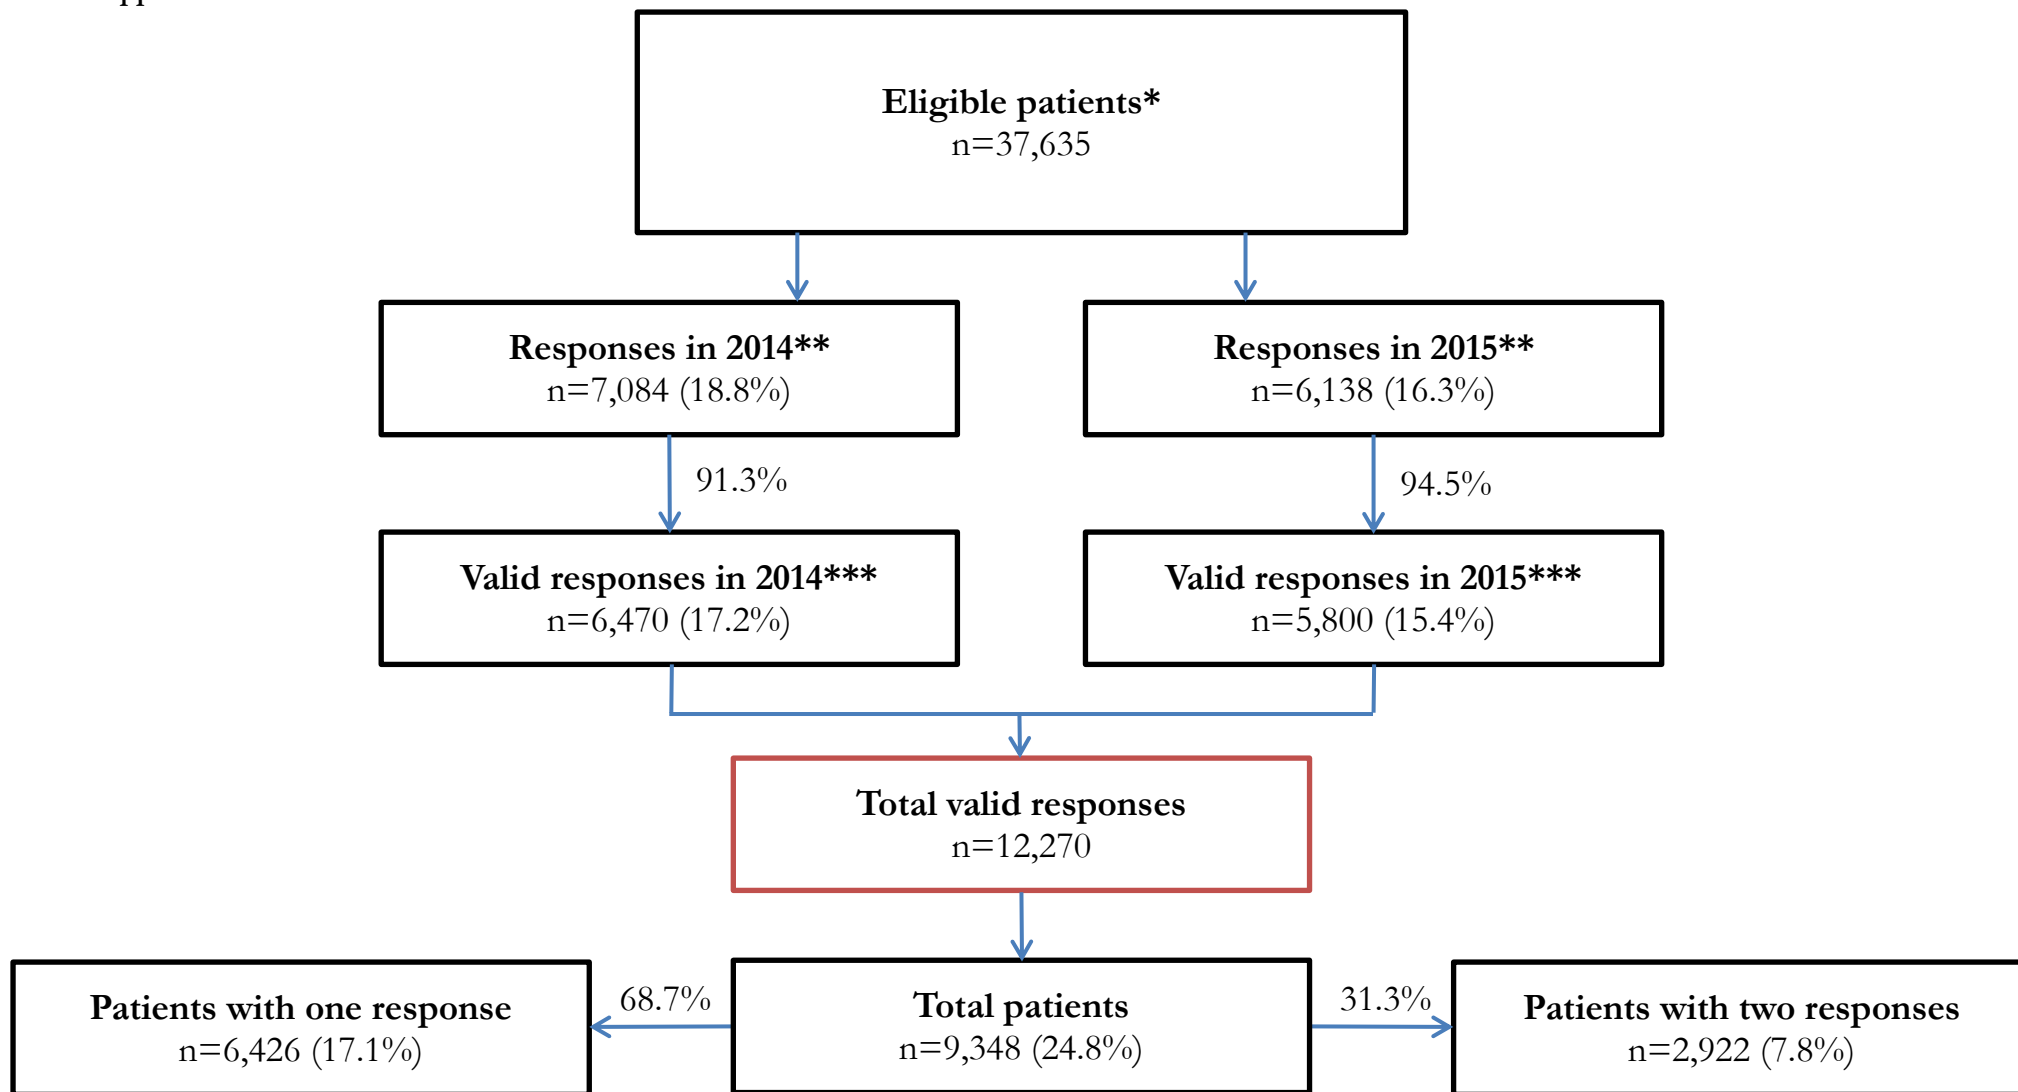

\*Patients were eligible if they had at least one long-term condition, were registered during both periods at any of the 34 general practices in Islington CCG who took part in the PAM pilot study, and had a valid IMD score.

\*\*A response is a questionnaire which was completed and returned by a patient, and then uploaded to their electronic medical record using a pre-specified read code by the patient's practice.

\*\*\*A valid response is a response with a score that is not 0 or 100.
